# Supplementary material
Source: MDPI journal article supplement (https://www.mdpi.com/1999-4907/9/7/378)

# Supplementary materials

## I Illustrative materials about experiment design

### A Example of two boxes for one treatment

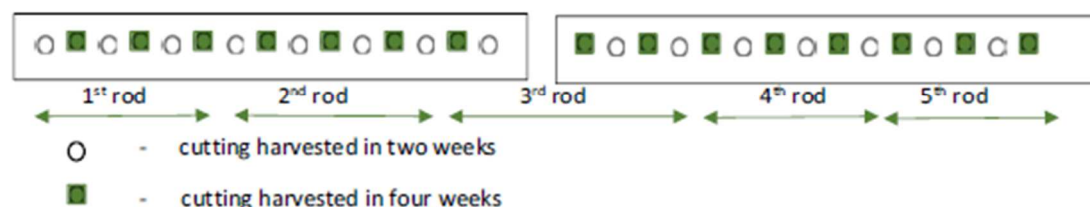

### B Treatment design in 2009. There are 15 cutting in each box.

#### Legends:

-  - Clone 78183
-  - Clone 81090
-  - Mineral fertilizer added
-  - Soil added
-  - Both soil and fertiliser added

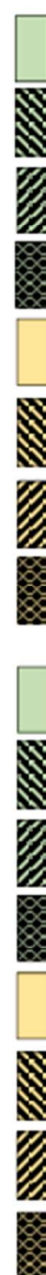

## Supplementary materials II

Experiment in 2009 after 3 weeks of establishment

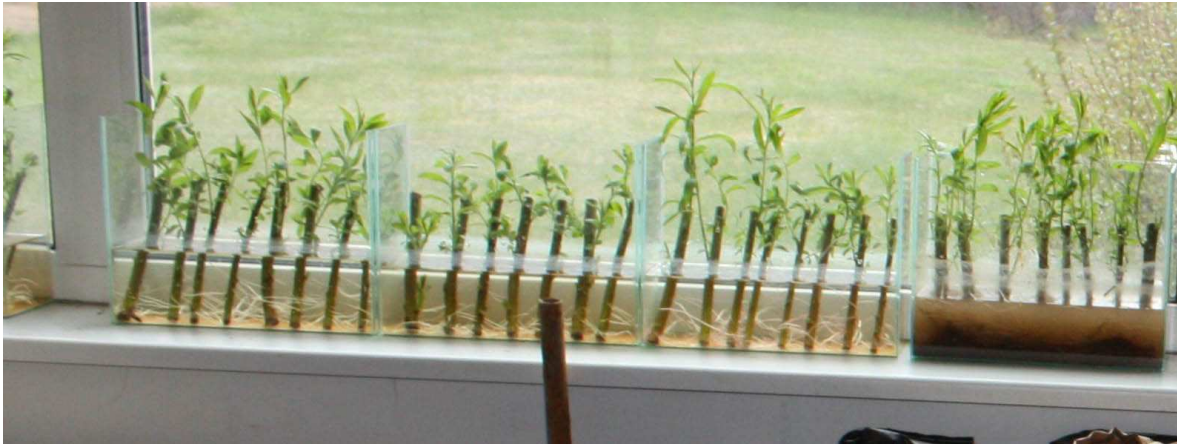

Supplement: s1 [file s1]
